# Supplementary material for: Atmospheric Radiation Measurement (ARM) airborne field campaign data products between 2013 and 2018
Source: Copernicus journal article supplement (doi:10.5194/essd-16-5429-2024), 2024-11-28
Supplement: Supplementary file 1 [file essd-16-5429-2024-supplement.pdf]

Supplement of Earth Syst. Sci. Data, 16, 5429–5448, 2024  
<https://doi.org/10.5194/essd-16-5429-2024-supplement>  
© Author(s) 2024. CC BY 4.0 License.

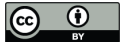

Open Access  
Earth System  
Science  
Data

*Supplement of*

## **Atmospheric Radiation Measurement (ARM) airborne field campaign data products between 2013 and 2018**

**Fan Mei et al.**

*Correspondence to:* Fan Mei ([fan.mei@pnnl.gov](mailto:fan.mei@pnnl.gov))

The copyright of individual parts of the supplement might differ from the article licence.



Table S1. Information about the merged AAF data product.

| Variables/ Input file names                                 | Units             | Instruments (DOI)                                                                       |
|-------------------------------------------------------------|-------------------|-----------------------------------------------------------------------------------------|
| <a href="#">aaf2dsh_c1[aaf2dsh.c1]</a>                      |                   | 2-Dimensional Stereo Probe (2D-S) , H channel (10.5439/1419322)                         |
| twodsh_alt(time)                                            | m                 |                                                                                         |
| twodsh_lat(time)                                            | degree N          |                                                                                         |
| twodsh_lon(time)                                            | degree E          |                                                                                         |
| twodsh_number_concentration(time, aaf2dsh_optical_diameter) | count/L/um        |                                                                                         |
| twodsh_total_number_concentration(time)                     | count/L           |                                                                                         |
| <a href="#">aaf2dsv_c1[aaf2dsv.c1]</a>                      |                   | 2-Dimensional Stereo Probe (2D-S) , V channel (10.5439/1419322)                         |
| twodsv_alt(time)                                            | m                 |                                                                                         |
| twodsv_lat(time)                                            | degree N          |                                                                                         |
| twodsv_lon(time)                                            | degree E          |                                                                                         |
| twodsv_number_concentration(time, aaf2dsv_optical_diameter) | count/L/um        |                                                                                         |
| twodsv_total_number_concentration(time)                     | count/L           |                                                                                         |
| <a href="#">aafams_b1[aafams.b1]</a>                        |                   | High-Resolution Time-of-flight Aerosol Mass Spectrometer (HR-ToF-AMS) (10.5439/1958311) |
| ams_CVI_enhancement_factor(time)                            | 1                 |                                                                                         |
| ams_Ch1(time)                                               | ug/m <sup>3</sup> |                                                                                         |
| ams_Ch1_err(time)                                           | ug/m <sup>3</sup> |                                                                                         |
| ams_NH4(time)                                               | ug/m <sup>3</sup> |                                                                                         |
| ams_NH4_err(time)                                           | ug/m <sup>3</sup> |                                                                                         |
| ams_NO3(time)                                               | ug/m <sup>3</sup> |                                                                                         |
| ams_NO3_err(time)                                           | ug/m <sup>3</sup> |                                                                                         |
| ams_Org(time)                                               | ug/m <sup>3</sup> |                                                                                         |
| ams_Org_err(time)                                           | ug/m <sup>3</sup> |                                                                                         |
| ams_SO4(time)                                               | ug/m <sup>3</sup> |                                                                                         |
| ams_SO4_err(time)                                           | ug/m <sup>3</sup> |                                                                                         |
| ams_alt(time)                                               | m                 |                                                                                         |
| ams_flag(time)                                              | 1                 |                                                                                         |
| ams_lat(time)                                               | degree N          |                                                                                         |
| ams_lon(time)                                               | degree E          |                                                                                         |
| <a href="#">aafccn2cola_b1[aafccn2cola.b1]</a>              |                   | Dual-Column Cloud Condensation Nuclei Counter (CCN) , Column A (10.5439/1349242)        |
| ccna_N_CCN(time)                                            | 1/cm <sup>3</sup> |                                                                                         |
| ccna_P_sample(time)                                         | hPa               |                                                                                         |
| ccna_T_inlet(time)                                          | degC              |                                                                                         |
| ccna_T_sample(time)                                         | degC              |                                                                                         |
| ccna_alt(time)                                              | m                 |                                                                                         |
| ccna_lat(time)                                              | degree N          |                                                                                         |
| ccna_lon(time)                                              | degree E          |                                                                                         |
| ccna_supersaturation_calculated(time)                       | %                 |                                                                                         |

|                                                |                   |                                                                                                                                              |
|------------------------------------------------|-------------------|----------------------------------------------------------------------------------------------------------------------------------------------|
| ccna_temp_unstable(time)                       | unitless          |                                                                                                                                              |
| <a href="#">aafcnc2colb_b1[aafcnc2colb.b1]</a> |                   | Dual-Column Cloud Condensation Nuclei Counter (CCN) , Column B (10.5439/1349243)                                                             |
| ccnb_N_CCN(time)                               | 1/cm <sup>3</sup> |                                                                                                                                              |
| ccnb_P_sample(time)                            | hPa               |                                                                                                                                              |
| ccnb_T_inlet(time)                             | degC              |                                                                                                                                              |
| ccnb_T_sample(time)                            | degC              |                                                                                                                                              |
| ccnb_alt(time)                                 | m                 |                                                                                                                                              |
| ccnb_lat(time)                                 | degree N          |                                                                                                                                              |
| ccnb_lon(time)                                 | degree E          |                                                                                                                                              |
| ccnb_supersaturation_calculated(time)          | %                 |                                                                                                                                              |
| ccnb_temp_unstable(time)                       | unitless          |                                                                                                                                              |
| <a href="#">aafco_a1[aafco.a1]</a>             |                   |                                                                                                                                              |
| aafco_co(time)                                 | ppmv              | Carbon monoxide (CO) mixing ratio calculated with nominal sensitivity correction (co) (10.5439/1244084)                                      |
| <a href="#">aafcpcfvi_a1[aafcpcfvi.a1]</a>     |                   | Condensation Particle Counter (CPC), Model 3772, after CVI inlet, a1 level data (10.5439/1361667)                                            |
| aafcpcfvi_concentration(time)                  | 1/cm <sup>3</sup> |                                                                                                                                              |
| <a href="#">aafcpcfvi_b1[aafcpcfvi.b1]</a>     |                   | Condensation Particle Counter (CPC), Model 3772, after CVI inlet, b1 level data (preferred data if available) (10.5439/1559904)              |
| cpcfvi_alt(time)                               | m                 |                                                                                                                                              |
| cpcfvi_concentration(time)                     | 1/cm <sup>3</sup> |                                                                                                                                              |
| cpcfvi_lat(time)                               | degree N          |                                                                                                                                              |
| cpcfvi_lon(time)                               | degree E          |                                                                                                                                              |
| <a href="#">aafcpcfiso_a1[aafcpcfiso.a1]</a>   |                   | Condensation Particle Counter (CPC), Model 3772, after ISOK inlet, a1 level data (10.5439/1361668)                                           |
| aafcpcfiso_concentration(time)                 | 1/cm <sup>3</sup> |                                                                                                                                              |
| <a href="#">aafcpcfiso_b1[aafcpcfiso.b1]</a>   |                   | Condensation Particle Counter (CPC), Model 3772, after ISOK inlet, b1 level data (preferred data if available) (10.5439/1373109)             |
| cpcfiso_alt(time)                              | m                 |                                                                                                                                              |
| cpcfiso_concentration(time)                    | 1/cm <sup>3</sup> |                                                                                                                                              |
| cpcfiso_lat(time)                              | degree N          |                                                                                                                                              |
| cpcfiso_lon(time)                              | degree E          |                                                                                                                                              |
| <a href="#">aafcpcu_a1[aafcpcu.a1]</a>         |                   | Ultrafine Condensation Particle Counter (UCPC), Model 3025A, after ISOK inlet, a1 level data (10.5439/1240264)                               |
| aafcpcu_concentration(time)                    | 1/cm <sup>3</sup> |                                                                                                                                              |
| <a href="#">aafcpcu_b1[aafcpcu.b1]</a>         |                   | Ultrafine Condensation Particle Counter (UCPC), Model 3025A, after ISOK inlet, b1 level data (preferred data if available) (10.5439/1349237) |
| cpcu_alt(time)                                 | m                 |                                                                                                                                              |
| cpcu_concentration(time)                       | 1/cm <sup>3</sup> |                                                                                                                                              |
| cpcu_lat(time)                                 | degree N          |                                                                                                                                              |
| cpcu_lon(time)                                 | degree E          |                                                                                                                                              |

|                                                                |                   |                                                                                |
|----------------------------------------------------------------|-------------------|--------------------------------------------------------------------------------|
| <b>aaffcdp_c1</b> [aaffcdp.c1]                                 |                   | Fast-Cloud Droplet Probe (F-CDP)<br>(10.5439/1417472)                          |
| fcdp_alt(time)                                                 | m                 |                                                                                |
| fcdp_lat(time)                                                 | degree N          |                                                                                |
| fcdp_lon(time)                                                 | degree E          |                                                                                |
| fcdp_number_concentration(time, aaffcdp_optical_diameter)      | count/L/um        |                                                                                |
| fcdp_total_number_concentration(time)                          | count/L           |                                                                                |
| <b>aaffims_b1</b> [aaffims.b1]                                 |                   | Fast Integrated Mobility Spectrometer (FIMS)<br>(10.5439/1908565)              |
| fims_alt(time)                                                 | m                 |                                                                                |
| fims_geometric_diameter_bounds(fims_geometric_diameter, bound) | nm                |                                                                                |
| fims_heated_flag(time)                                         | 1                 |                                                                                |
| fims_lat(time)                                                 | degree N          |                                                                                |
| fims_lon(time)                                                 | degree E          |                                                                                |
| fims_number_concentration(time, fims_geometric_diameter)       | 1/cm <sup>3</sup> |                                                                                |
| fims_pressure(time)                                            | hPa               |                                                                                |
| fims_temperature(time)                                         | degC              |                                                                                |
| <b>aafhyps_c1</b> [aafhyps.c1]                                 |                   | High Volume Precipitation Spectrometer Version 3 (HVPS-3)<br>(10.5439/1417471) |
| hvps_alt(time)                                                 | m                 |                                                                                |
| hvps_lat(time)                                                 | degree N          |                                                                                |
| hvps_lon(time)                                                 | degree E          |                                                                                |
| hvps_number_concentration(time, aafhyps_optical_diameter)      | count/L/um        |                                                                                |
| hvps_total_number_concentration(time)                          | count/L           |                                                                                |
| <b>aafinletcvi_c1</b> [aafinletcvi.c1]                         |                   | Counterflow Virtual Impactor (CVI) Inlet<br>(10.5439/1241543)                  |
| inletcvi_alt(time)                                             | m                 |                                                                                |
| inletcvi_cvi_cut_size(time)                                    | um                |                                                                                |
| inletcvi_enhancement_factor(time)                              | 1                 |                                                                                |
| inletcvi_inlet_dilution_factor(time)                           | 1                 |                                                                                |
| inletcvi_inlet_selector(time)                                  | 1                 |                                                                                |
| inletcvi_lat(time)                                             | degree N          |                                                                                |
| inletcvi_lon(time)                                             | degree E          |                                                                                |
| <b>aafinletisok_a1</b> [aafinletisok.a1]                       |                   | Aerosol Isokinetic Inlet<br>(10.5439/1241544)                                  |
| inletisok_cabin_temperature(time)                              | degC              |                                                                                |
| inletisok_pressure_isok_inlet(time)                            | hPa               |                                                                                |
| inletisok_relative_humidity_isok_inlet(time)                   | %                 |                                                                                |
| inletisok_temperature_isok_inlet(time)                         | degC              |                                                                                |
| <b>aafmergedaerosolsd_c1</b> [aafmergedaerosolsd.c1]           |                   | Merged aerosol size distribution (prefered)<br>(10.5439/1905541)               |
| aerosolsd_alt(time)                                            | m                 |                                                                                |

|                                                                     |  |            |                                                                                                     |
|---------------------------------------------------------------------|--|------------|-----------------------------------------------------------------------------------------------------|
| aerosolsd_cas_flag(time)                                            |  | 1          |                                                                                                     |
| aerosolsd_cloud_flag(time)                                          |  | 1          |                                                                                                     |
| aerosolsd_cvi_flag(time)                                            |  | 1          |                                                                                                     |
| aerosolsd_fcdp_flag(time)                                           |  | 1          |                                                                                                     |
| aerosolsd_fims_flag(time)                                           |  | 1          |                                                                                                     |
| aerosolsd_geometric_diameter_bounds(merged_optical_diameter, bound) |  | nm         |                                                                                                     |
| aerosolsd_lat(time)                                                 |  | degree_N   |                                                                                                     |
| aerosolsd_lon(time)                                                 |  | degree_E   |                                                                                                     |
| aerosolsd_number_concentration(time, merged_geometric_diameter)     |  | 1/cm^3     |                                                                                                     |
| aerosolsd_optical_diameter_bounds(merged_geometric_diameter, bound) |  | um         |                                                                                                     |
| aerosolsd_pcasp_flag(time)                                          |  | 1          |                                                                                                     |
| <b>aafmergedcldsd_c1[aafmergedcldsd.c1]</b>                         |  |            | Merged cloud size distribution (prefered) (10.5439/1897918)                                         |
| cldsd_alt(time)                                                     |  | m          |                                                                                                     |
| cldsd_lat(time)                                                     |  | degree_N   |                                                                                                     |
| cldsd_lon(time)                                                     |  | degree_E   |                                                                                                     |
| cldsd_number_concentration(time, cldsd_optical_diameter)            |  | count/L/um |                                                                                                     |
| cldsd_optical_diameter_bounds(cldsd_optical_diameter, bound)        |  | um         |                                                                                                     |
| cldsd_total_number_concentration(time)                              |  | count/L    |                                                                                                     |
| <b>aafnaviwig_c1[aafnaviwig.c1]</b>                                 |  |            | Multiple sensors from the atmospheric state and aircraft state session in Table 2 (10.5439/1375937) |
| alt(time)                                                           |  | m          |                                                                                                     |
| ambient_temp(time)                                                  |  | degC       |                                                                                                     |
| angle_of_attack(time)                                               |  | degree     |                                                                                                     |
| cabin_pressure(time)                                                |  | hPa        |                                                                                                     |
| cabin_temperature(time)                                             |  | degC       |                                                                                                     |
| dewpoint_temperature(time)                                          |  | degC       |                                                                                                     |
| dynamic_pressure(time)                                              |  | hPa        |                                                                                                     |
| ground_speed(time)                                                  |  | m/s        |                                                                                                     |
| indicated_airspeed(time)                                            |  | m/s        |                                                                                                     |
| lat(time)                                                           |  | degree_N   |                                                                                                     |
| leg_number(time)                                                    |  | unitless   |                                                                                                     |
| lon(time)                                                           |  | degree_E   |                                                                                                     |
| pitch(time)                                                         |  | degree     |                                                                                                     |
| potential_temperature(time)                                         |  | degC       |                                                                                                     |
| press_alt(time)                                                     |  | m          |                                                                                                     |
| qc_flag(time)                                                       |  | unitless   |                                                                                                     |
| radar_alt(time)                                                     |  | m          |                                                                                                     |

|                                                          |                    |                                                                           |
|----------------------------------------------------------|--------------------|---------------------------------------------------------------------------|
| relative_humidity_ice(time)                              | %                  |                                                                           |
| relative_humidity_water(time)                            | %                  |                                                                           |
| roll(time)                                               | degree             |                                                                           |
| side_slip(time)                                          | degree             |                                                                           |
| solar_zenith_ground(time)                                | degree             |                                                                           |
| static_pressure(time)                                    | hPa                |                                                                           |
| sun_azimuth_aircraft(time)                               | degree             |                                                                           |
| sun_azimuth_ground(time)                                 | degree             |                                                                           |
| sun_elev_aircraft(time)                                  | degree             |                                                                           |
| total_temp(time)                                         | degC               |                                                                           |
| true_airspeed(time)                                      | m/s                |                                                                           |
| true_heading(time)                                       | degree             |                                                                           |
| vert_wind_speed(time)                                    | m/s                |                                                                           |
| vertical_velocity(time)                                  | m/s                |                                                                           |
| wgs_alt(time)                                            | m                  |                                                                           |
| wind_direction(time)                                     | degree             |                                                                           |
| wind_speed(time)                                         | m/s                |                                                                           |
| <b>aafneph_b1[aafneph.b1]</b>                            |                    |                                                                           |
| neph_Bbs_B(time)                                         | 1/Mm               | 3-Wavelength Integrating Nephelometer, Model 3563 (10.5439/1372684)       |
| neph_Bbs_G(time)                                         | 1/Mm               |                                                                           |
| neph_Bbs_R(time)                                         | 1/Mm               |                                                                           |
| neph_Bs_B(time)                                          | 1/Mm               |                                                                           |
| neph_Bs_G(time)                                          | 1/Mm               |                                                                           |
| neph_Bs_R(time)                                          | 1/Mm               |                                                                           |
| neph_P_sample(time)                                      | hPa                |                                                                           |
| neph_RH_sample(time)                                     | %                  |                                                                           |
| neph_T_inlet(time)                                       | degC               |                                                                           |
| neph_T_sample(time)                                      | degC               |                                                                           |
| <b>aafo3_c1[aafo3.c1]</b>                                |                    |                                                                           |
| o3_alt(time)                                             | m                  | Ozone concentration - Model 49i (10.5439/1488851)                         |
| o3_lat(time)                                             | degree N           |                                                                           |
| o3_lon(time)                                             | degree E           |                                                                           |
| o3_o3(time)                                              | ppbv               |                                                                           |
| <b>aafpcasp_a1[aafpcasp.a1]</b>                          |                    |                                                                           |
| pcasp_sample_flow_rate(time)                             | cm <sup>3</sup> /s | Passive Cavity Aerosol Spectrometer-100X (PCASP) (10.5439/1245509)        |
| pcasp_sheath_flow_rate(time)                             | cm <sup>3</sup> /s |                                                                           |
| pcasp_size_distribution(time, aafpcasp_optical_diameter) | count/s            |                                                                           |
| <b>aafpsap1s_b1[aafpsap1s.b1]</b>                        |                    |                                                                           |
| psap_Ba_B_Weiss(time)                                    | 1/Mm               | 3-Wavelength Particle Soot/Absorption Photometer (PSAP) (10.5439/1494909) |
| psap_Ba_B_raw(time)                                      | 1/Mm               |                                                                           |

|                                              |                       |                                                                                                                       |
|----------------------------------------------|-----------------------|-----------------------------------------------------------------------------------------------------------------------|
| psap_Ba_G_Weiss(time)                        | 1/Mm                  |                                                                                                                       |
| psap_Ba_G_raw(time)                          | 1/Mm                  |                                                                                                                       |
| psap_Ba_R_Weiss(time)                        | 1/Mm                  |                                                                                                                       |
| psap_Ba_R_raw(time)                          | 1/Mm                  |                                                                                                                       |
| psap_alt(time)                               | m                     |                                                                                                                       |
| psap_lat(time)                               | degree N              |                                                                                                                       |
| psap_lon(time)                               | degree E              |                                                                                                                       |
| <b>aafso2_c1</b> [aafso2.c1]                 |                       | Sulfur dioxide (SO <sub>2</sub> ) mixing ratio calculated with nominal sensitivity correction (so2) (10.5439/1244691) |
| so2_alt(time)                                | m                     |                                                                                                                       |
| so2_lat(time)                                | degree N              |                                                                                                                       |
| so2_lon(time)                                | degree E              |                                                                                                                       |
| so2_so2(time)                                |                       |                                                                                                                       |
| <b>aafsp2rbc10s_c1</b> [aafsp2rbc10s.c1]     |                       | Single Particle Soot Photometer (SP2) (10.5439/1458760)                                                               |
| sp2_N_dN_rBC(time, diameter_geo)             | count/cm <sup>3</sup> |                                                                                                                       |
| sp2_alt(time)                                | m                     |                                                                                                                       |
| sp2_diameter_geo_bounds(diameter_geo, bound) | um                    |                                                                                                                       |
| sp2_lat(time)                                | degree N              |                                                                                                                       |
| sp2_lon(time)                                | degree E              |                                                                                                                       |
| sp2_rBC(time)                                |                       |                                                                                                                       |
| <b>aafuhsas_a1</b> [aafuhsas.a1]             |                       | Ultra-High Sensitivity Aerosol Spectrometer (UHSAS) (10.5439/1244083)                                                 |
| uhsas_flow(time)                             | cc/min                |                                                                                                                       |
| uhsas_lower_size_limit(bin_number)           | nm                    |                                                                                                                       |
| uhsas_sample_flow_rate(time)                 | cc/min                |                                                                                                                       |
| uhsas_sample_pressure(time)                  | kPa                   |                                                                                                                       |
| uhsas_sheath_flow(time)                      | cc/min                |                                                                                                                       |
| uhsas_size_distribution(time, bin_number)    | count                 |                                                                                                                       |

Table S2. Information of the data availability for each field campaign (green: data available; yellow: N/A).

| Measurement | datastream            | CACTI | ACE-ENA | HI-SCALE | ACAPEX | ACME-V | GoAmazon | BBOP |
|-------------|-----------------------|-------|---------|----------|--------|--------|----------|------|
| Meteorology | aafnaviwg.c1          |       |         |          |        |        |          |      |
|             | aafdewpoint.a1        |       |         |          |        |        |          |      |
| Cloud       | aaf2dsh.c1            |       |         |          |        |        |          | N/A  |
|             | aaf2dsv.c1            |       |         |          |        |        |          | N/A  |
|             | aaffcdp.c1            |       |         |          |        |        |          | N/A  |
|             | aafhyps.c1            |       |         |          |        |        |          | N/A  |
|             | aafmergedaerosolsd.c1 |       |         |          | N/A    | N/A    | N/A      | N/A  |
| Aerosol     | aafccn2cola.b1        |       |         |          |        |        |          |      |



|           |                  |  |     |     |     |     |     |     |
|-----------|------------------|--|-----|-----|-----|-----|-----|-----|
|           | aafccn2colb.b1   |  |     |     |     |     |     |     |
|           | aafinletcvi.c1   |  |     |     |     | N/A | N/A | N/A |
|           | aafinletisok.a1  |  |     |     |     | N/A | N/A | N/A |
|           | aafpcfcvi.b1     |  |     |     |     |     |     |     |
|           | aafpcfiso.b1     |  |     |     |     |     |     |     |
|           | aafpcpu.b1       |  |     |     |     |     |     |     |
|           | aafneph.b1       |  |     | N/A |     |     |     |     |
|           | aafpsap.b1       |  |     | N/A |     |     |     |     |
|           | aafuhsas.a1      |  | N/A |     |     |     |     |     |
|           | aafpcasp.a1      |  |     |     |     |     |     |     |
|           | aaffims.b1       |  |     |     |     |     |     |     |
|           | aafmergedclsd.c1 |  |     |     | N/A | N/A | N/A | N/A |
|           | aafams.b1        |  |     |     | N/A | N/A |     | N/A |
| Trace gas | aafso2.c1        |  |     |     | N/A | N/A |     |     |
|           | aafco.c1         |  |     |     |     |     |     |     |
|           | aafso3.c1        |  |     |     |     | N/A |     |     |
|           | aafsp2rbc10s.c1  |  |     | N/A |     |     |     |     |

Table S3. List of compared measurement ranges and measurement variances among airborne measurements during the GoAmazon field campaign.

| Measurement Variables                        | Measured Range during the Field Campaign | Measurement Variances between the Two Aircraft                                                          |
|----------------------------------------------|------------------------------------------|---------------------------------------------------------------------------------------------------------|
| Static Pressure                              | 500 – 1010 hPa                           | < 1 %                                                                                                   |
| Static air temperature                       | 272 – 310 K                              | < 1%                                                                                                    |
| Dewpoint temperature                         | 230 -300 K                               | Without clouds, <1%<br>With clouds, the measurement from the G1 can be up to 5% lower than that of HALO |
| 3-D wind                                     | 1-15 m/s                                 | < 40%                                                                                                   |
| Particle number concentration                | 500 – 15,000 cm <sup>-3</sup>            | < 20% for CPC, <50% for UHSAS (size dependent)                                                          |
| Non-Refractory particle chemical composition | < 10 µg·m <sup>-3</sup>                  | < 10% above 2500 m<br>Up to 50% below 2500 m                                                            |
| CCN concentration                            | SS=0.25%, 100 – 2000 cm <sup>-3</sup>    | < 10% above 2500 m<br>Up to 50% below 2500 m                                                            |
| Gas phase concentration                      | Ozone: 15-75 ppb<br>CO: 50-200 ppb       | Ozone: < 25%<br>CO: < 15%                                                                               |
| Cloud droplet number concentration           | 3- 20 µm                                 | <50 %                                                                                                   |

Table S4. A reference table of ARM primary measurements corresponding to the CF standard names.

| Primary measurements              | CF standard name                                            |
|-----------------------------------|-------------------------------------------------------------|
| twodsh_total_number_concentration | number_concentration_of_cloud_liquid_water_particles_in_air |
| twodsv_total_number_concentration | number_concentration_of_cloud_liquid_water_particles_in_air |

|                                 |                                                                                         |
|---------------------------------|-----------------------------------------------------------------------------------------|
| ams_Ch1                         | mass_concentration_of_chlorine_dry_aerosol_particles_in_air                             |
| ams_NH4                         | mass_concentration_of_ammonium_dry_aerosol_particles_in_air                             |
| ams_Org                         | mass_concentration_of_particulate_organic_matter_dry_aerosol_particles_in_air           |
| ams_SO4                         | mass_concentration_of_sulfate_ambient_aerosol_particles_in_air                          |
| ams_NO3                         | mass_concentration_of_nitrate_dry_aerosol_particles_in_air                              |
| ccna_N_CCN                      | number_concentration_of_cloud_condensation_nuclei_in_air                                |
| ccnb_N_CCN                      | number_concentration_of_cloud_condensation_nuclei_in_air                                |
| cpcfvi_concentration            | number_concentration_of_aerosol_particles_in_air                                        |
| cpcfiso_concentration           | number_concentration_of_aerosol_particles_in_air                                        |
| cpcu_concentration              | number_concentration_of_aerosol_particles_in_air                                        |
| fcdp_total)number_concentration | number_concentration_of_cloud_liquid_water_particles_in_air                             |
| fims_number_concentration       | number_size_distribution_of_aerosol_particles_in_air                                    |
| hvps_total_number_concentration | number_concentration_of_cloud_liquid_water_particles_in_air                             |
| aerosolsd_number_concentration  | atmosphere_number_content_of_aerosol_particles                                          |
| cldsd_number_concentration      | number_concentration_of_cloud_liquid_water_particles_in_air                             |
| alt                             | altitude                                                                                |
| ambient_temp                    | air_temperature                                                                         |
| dewpoint_temperature            | dew_point_temperature                                                                   |
| lat                             | latitude                                                                                |
| lon                             | longitude                                                                               |
| pitch                           | platform_pitch                                                                          |
| press_alt                       | barometric_altitude                                                                     |
| relative_humidity_water         | relative_humidity                                                                       |
| roll                            | platform_roll                                                                           |
| static_pressure                 | air_pressure                                                                            |
| vert_wind_speed                 | wind_speed                                                                              |
| wind_direction                  | wind_from_direction                                                                     |
| wind_speed                      | wind_speed                                                                              |
| neph_Bbs_B                      | volume_backwards_scattering_coefficient_in_air_due_to_dried_aerosol_particles           |
| neph_Bbs_G                      | volume_backwards_scattering_coefficient_in_air_due_to_dried_aerosol_particles           |
| neph_Bbs_R                      | volume_backwards_scattering_coefficient_in_air_due_to_dried_aerosol_particles           |
| neph_Bs_B                       | volume_scattering_coefficient_of_radiative_flux_in_air_due_to_ambient_aerosol_particles |
| neph_Bs_G                       | volume_scattering_coefficient_of_radiative_flux_in_air_due_to_ambient_aerosol_particles |
| neph_Bs_R                       | volume_scattering_coefficient_of_radiative_flux_in_air_due_to_ambient_aerosol_particles |

|                         |                                                                                          |
|-------------------------|------------------------------------------------------------------------------------------|
| o3                      | atmosphere_mass_content_of_ozone                                                         |
| psap_Ba_B_Weiss         | mass_concentration_of_absorption_equivalent_black_carbon_of_dry_aerosol_particles_in_air |
| psap_Ba_G_Weiss         | mass_concentration_of_absorption_equivalent_black_carbon_of_dry_aerosol_particles_in_air |
| psap_Ba_R_Weiss         | mass_concentration_of_absorption_equivalent_black_carbon_of_dry_aerosol_particles_in_air |
| so2                     | atmosphere_mass_content_of_sulfur_dioxide                                                |
| sp2_rBC                 | mass_concentration_of_absorption_equivalent_black_carbon_of_dry_aerosol_particles_in_air |
| uhsas_size_distribution | number_size_distribution_of_aerosol_particles_in_air                                     |

## Description of a quickplot script

Users can open and review the data using Panoply, as show in Figure S2.

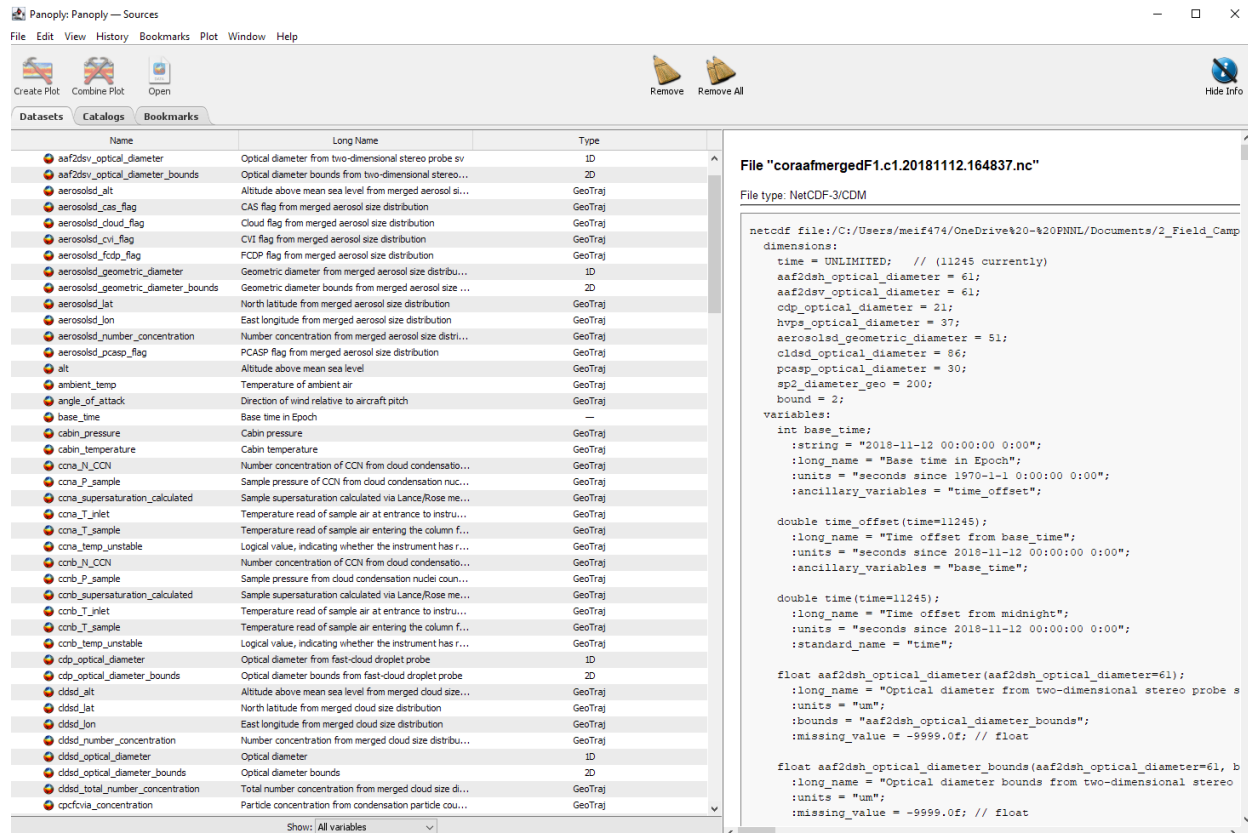

Figure S2. A screenshot of using Panoply to open this netCDF data.

A plotting script has been developed to create quicklook plots (as shown in Fig. S3) for 1D variables. User can request that script by contacting the authors. This script requires 3 input arguments: the directory where input files are located, the name of the input file or a substring to pattern match to identify more than one input file, and a list of all variables to plot.

One example for plotting the variables “twodsv\_total\_number\_concentration and vert\_wind\_speed” for all files in 2018 is below. It assumes the user has setup and activated the aafmerged\_plot conda environment. Please contact authors if you need help to set up conda environment.

```
python3 plot_aafmerged.py -d /data/vap/gaustad/aafmerged/datastream/cor/coraafmergedF1.c1/  
-f coraafmergedF1.c1.20181 -v twodsv_total_number_concentration vert_wind_speed
```

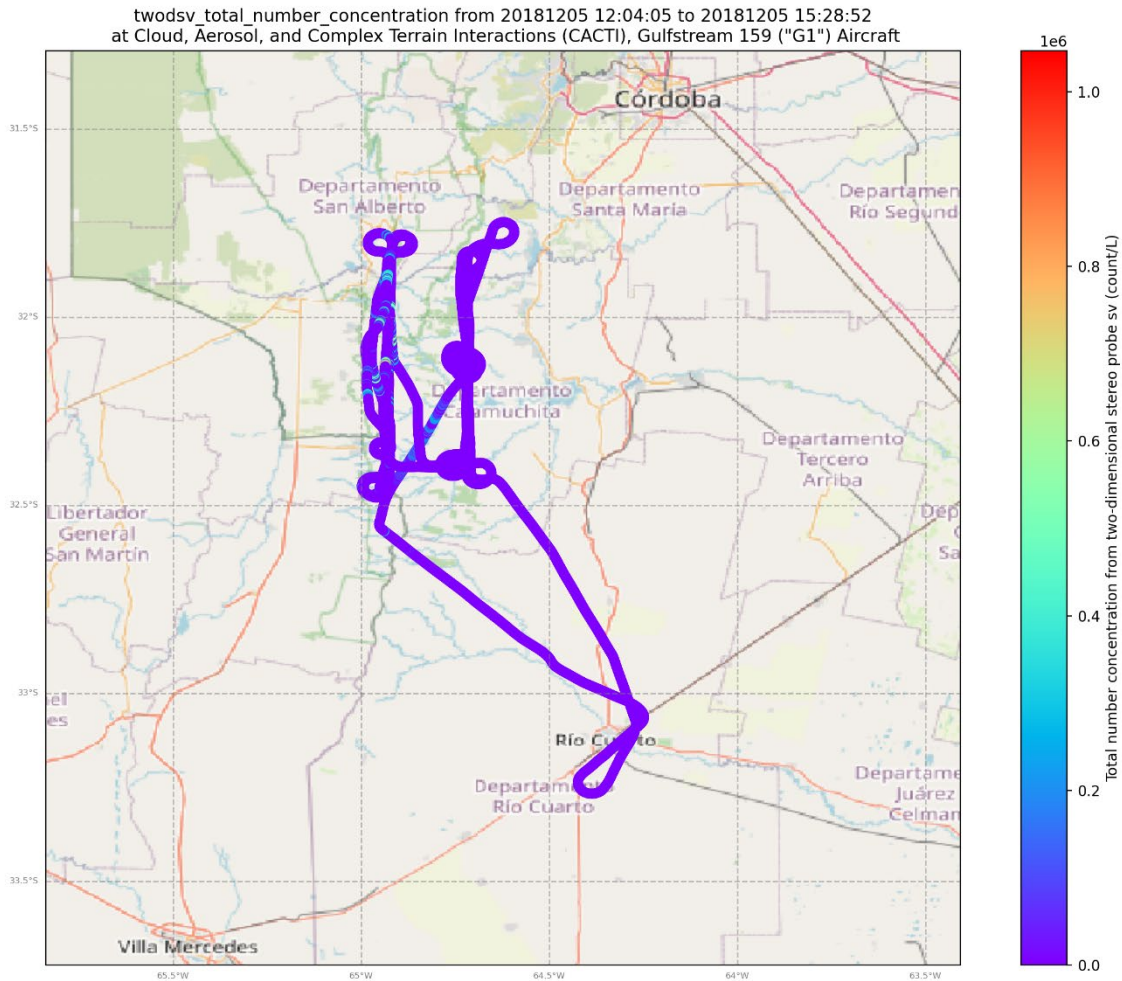

Figure S3. An example quicklook plot using ARM Atmospheric data Community Toolkit developed using Python (<https://github.com/ARM-DOE/ACT>).

The map is based on Cartopy. Cartopy was originally developed at the UK Met Office to allow scientists to visualize their data on maps quickly, easily and most importantly, accurately. Cartopy has been made freely available under the terms of the [BSD 3-Clause License](#).
